# Supplementary material for: mTORC1 in the orbitofrontal cortex promotes habitual alcohol seeking
Source: eLife. 2019 Dec 11;8:e51333. doi: 10.7554/eLife.51333 (PMC6959998; doi:10.7554/eLife.51333)
Supplement: Figure 1—figure supplement 3—source data 1. [file elife-51333-fig1-figsupp3-data1.xlsx]

## Sheet: Figure 1 - figure supplement 3
		VEH	Rapamycin			VEH	Rapamycin			VEH	Rapamycin
	Inactive lever press	0	0		Latency first press	0.607667	0.277833		Latency last press	13.9812	15.8008
		0	0			0.667	1.7045			10.3605	3.74783
		2	0			1.42933	1.506			14.2952	2.75383
		0	0			0.996833	0.9465			14.0548	6.95533
		1	0			2.99533	2.60583			9.59867	11.5947
		1	0			0.1245	0.717167			7.07	18.2177
		0	2			0.650167	0.0813333			11.856	11.5077
		0	0			0.225	0.478167			8.12817	3.7765
		0	4			0.2425	0.0356667			4.40783	2.20017
