# Supplementary material for: mTORC1 in the orbitofrontal cortex promotes habitual alcohol seeking
Source: eLife. 2019 Dec 11;8:e51333. doi: 10.7554/eLife.51333 (PMC6959998; doi:10.7554/eLife.51333)
Supplement: Figure 1—figure supplement 4—source data 1. [file elife-51333-fig1-figsupp4-data1.xlsx]

## Sheet: Figure 1 - figure supplement 4
	time	veh									rapa
	1	7.9	31.3	7.7	18.8	0	8.3	0	24	26.7	15.2	15.4	28.6	24	0	0	5.6	10	17.4
	2	15.8	6.3	7.7	10.4	10	5.6	4.8	4	3.3	15.2	15.4	0	0	0	0	0	10	8.7
	3	18.4	0	23.1	18.8	30	19.4	23.8	16	10	24.2	7.7	0	4	27.3	19	16.7	5	21.7
	4	10.5	0	7.7	14.6	25	27.8	23.8	4	6.7	3	7.7	0	12	27.3	23.8	27.8	5	21.7
	5	10.5	9.4	0	8.3	5	8.3	0	8	10	9.1	0	0	12	13.6	9.5	5.6	10	4.3
	6	7.9	3.1	0	4.2	5	11.1	0	4	10	3	0	0	4	0	14.3	0	25	8.7
	7	2.6	9.4	7.7	2.1	0	0	14.3	0	6.7	0	15.4	0	4	0	0	0	15	4.3
	8	0	6.3	0	0	0	2.8	0	0	3.3	0	0	0	0	4.5	4.8	5.6	0	4.3
	9	2.6	3.1	0	4.2	0	0	0	0	0	0	0	0	8	0	0	0	0	0
	10	0	3.1	0	0	0	2.8	0	0	6.7	0	0	0	0	0	4.8	0	0	0
	11	0	0	0	0	0	0	0	8	3.3	0	7.7	0	4	0	0	0	0	0
	12	2.6	3.1	0	0	0	0	0	0	0	0	7.7	0	4	0	0	0	0	0
	13	0	3.1	0	0	0	2.8	0	0	0	0	0	0	0	0	0	0	5	0
	14	2.6	3.1	7.7	0	0	0	0	12	0	0	0	0	4	0	0	0	0	0
	15	0	0	0	2.1	0	0	0	0	3.3	0	0	0	0	0	0	0	0	4.3
	16	2.6	0	0	0	0	0	0	0	0	0	0	0	0	0	0	0	5	0
	17	0	3.1	0	0	5	0	0	0	3.3	6.1	0	14.3	0	4.5	0	0	0	0
	18	0	3.1	0	0	0	2.8	0	0	0	0	0	0	0	0	0	0	0	0
	19	0	0	0	2.1	0	0	0	0	0	0	0	0	8	0	0	0	0	0
	20	0	0	0	0	0	0	0	4	0	0	0	0	0	0	0	0	0	0
