# Supplementary material for: mTORC1 in the orbitofrontal cortex promotes habitual alcohol seeking
Source: eLife. 2019 Dec 11;8:e51333. doi: 10.7554/eLife.51333 (PMC6959998; doi:10.7554/eLife.51333)
Supplement: Figure 1—source data 1. [file elife-51333-fig1-data1.xlsx]

## Sheet: Figure 1 - source data 1
	a
	Time	vehicle								Time	rapamycin
	3	27	6	12	6	16	42	6		3	12	9	21	9	34	45	0
	6	27	15	26	12	24	83	24		6	13	22	41	21	44	79	19
	9	27	21	46	24	36	83	24		9	13	31	66	26	51	79	24
	12	28	25	66	33	36	83	24		12	13	33	72	26	54	105	42
	15	29	30	77	33	36	83	24		15	17	40	72	26	54	120	42
	18	29	30	81	33	36	90	24		18	17	46	72	26	54	120	42
	21	29	30	81	33	36	90	24		21	17	55	72	26	54	120	42
	24	29	30	81	33	36	90	24		24	17	57	72	26	54	120	42
	27	29	30	81	33	36	90	24		27	17	61	72	26	54	120	42
	30	29	30	81	33	36	90	24		30	17	61	72	26	54	121	42
