# Supplementary material for: mTORC1 in the orbitofrontal cortex promotes habitual alcohol seeking
Source: eLife. 2019 Dec 11;8:e51333. doi: 10.7554/eLife.51333 (PMC6959998; doi:10.7554/eLife.51333)
Supplement: Figure 1—source data 2. [file elife-51333-fig1-data2.xlsx]

## Sheet: Figure 1 - source data 2
	b				c
		veh	rapa			veh	rapa
	Lever presses	29	17		Alcohol intake	0.2	0.13
		30	61			0.32	0.65
		81	72			0.65	0.58
		33	26			0.36	0.26
		36	54			0.36	0.54
		90	121			0.64	0.94
		24	42			0.2	0.36
