# Supplementary material for: mTORC1 in the orbitofrontal cortex promotes habitual alcohol seeking
Source: eLife. 2019 Dec 11;8:e51333. doi: 10.7554/eLife.51333 (PMC6959998; doi:10.7554/eLife.51333)
Supplement: Figure 1—source data 3. [file elife-51333-fig1-data3.xlsx]

## Sheet: Figure 1 - source data 3
		d
		Time	veh									rapa
		3	22	12	10	7	1	21	13	15	19	13	10	5	17	7	9	5	16	21
		6	31	26	10	26	9	22	18	19	28	19	11	5	17	10	14	11	18	21
		9	31	26	10	27	9	34	18	23	28	30	11	5	23	19	14	14	18	21
		12	31	30	10	44	18	34	19	23	28	30	11	5	23	20	14	16	18	21
		15	36	30	11	46	18	34	19	23	28	30	11	5	23	20	14	16	18	21
		18	36	30	11	46	18	34	19	23	28	31	11	5	23	20	15	16	18	21
		21	36	30	11	46	18	34	19	23	28	31	11	5	23	20	19	16	18	21
		24	36	30	11	46	18	34	19	23	28	31	11	5	23	20	19	16	18	21
		27	36	30	11	46	18	34	19	23	28	31	11	5	23	20	19	16	18	21
		30	36	30	11	46	18	34	19	23	28	31	11	5	23	20	19	16	18	21
