# Supplementary material for: mTORC1 in the orbitofrontal cortex promotes habitual alcohol seeking
Source: eLife. 2019 Dec 11;8:e51333. doi: 10.7554/eLife.51333 (PMC6959998; doi:10.7554/eLife.51333)
Supplement: Figure 1—source data 4. [file elife-51333-fig1-data4.xlsx]

## Sheet: Figure 1 - source data 4
	e
		veh	rapa
	Lever presses	36	31
		30	11
		11	5
		46	23
		18	20
		34	19
		19	16
		23	18
		28	21
