# Supplementary material for: mTORC1 in the orbitofrontal cortex promotes habitual alcohol seeking
Source: eLife. 2019 Dec 11;8:e51333. doi: 10.7554/eLife.51333 (PMC6959998; doi:10.7554/eLife.51333)
Supplement: Figure 2—figure supplement 1—source data 1. — Alcohol consumed (g/kg) during 1 hr RR and RI training sessions (Figure 2—figure supplements 1b). [file elife-51333-fig2-figsupp1-data1.xlsx]

## Sheet: Figure 2 - figure supplement 1a
	lever responses	RR
	Session	1	2	3	4	5	6	7	8	9	10	11	12	13	14	15	16	17	18	19	20
		41	40	47	50	37	4	30	60	21	7	41	33	49	3	3	21	41	62	68	64
		61	52	47	35	41	78	42	57	74	77	86	80	96	109	94	65	72	63	68	54
		14	19	9	26	22	41	26	28	76	73	101	33	24	38	46	48	42	31	35	37
		75	69	82	68	67	127	36	76	27	24	42	102	105	105	92	140	83	68	105	111
		31	39	22	14	23	26	11	20	30	43	67	65	58	5	61	61	69	54	54	60
		27	32	45	36	60	48	51	26	27	16	20	53	50	45	17	54	20	32	30	33
		30	19	7	25	32	24	26	41	37	29	32	52	18	21	15	31	21	66	13	33
		28	0	9	31	26	20	16	8	28	2	30	78	15	19	5	3	11	81	4	18
		33	49	26	50	31	49	27	64	48	31	28	81	86	65	41	23	65	95	80	52
		17	3	9	46	29	14	46	19	25	33	21	28	32	40	21	31	23	41	36	27
		50	36	33	37	7	19	45	46	37	29	43	67	32	33	5	61	46	54	42	53
		12	11	4	35	51	60	46	48	35	35	60	69	46	53	16	81	64	86	79	84
	lever responses	RI
	Session	1	2	3	4	5	6	7	8	9	10	11	12	13	14	15	16	17	18	19	20
		43	60	45	45	41	15	65	81	53	45	41	53	65	77	148	46	86	74	48	80
		59	79	53	32	70	31	17	67	14	77	92	29	57	33	35	27	40	78	56	33
		25	20	30	41	51	42	30	61	26	68	59	64	118	50	59	85	75	63	66	22
		34	15	32	17	13	30	4	23	16	14	11	37	47	4	26	35	11	11	21	25
		68	23	17	31	57	47	80	48	52	40	38	57	56	82	29	26	40	36	67	30
		59	88	72	108	70	103	105	101	69	80	93	87	122	129	106	90	65	181	91	110
		33	35	29	50	37	36	24	18	17	46	63	46	74	28	16	41	48	28	38	21
		24	39	41	20	30	28	39	18	29	22	31	31	41	46	18	55	13	32	33	29
		50	70	32	68	69	63	60	58	60	69	73	90	53	76	26	62	97	109	85	87
		46	57	133	68	112	89	118	56	77	76	132	174	94	117	24	113	81	130	111	110

## Sheet: Figure 2 - figure supplement 1b
	alcohol consumption (g/kg/1h)	RR
	session	1	2	3	4	5	6	7	8	9	10	11	12	13	14	15	16	17	18	19	20
		0.555964	0.513197	0.542404	0.625851	0.458957	0.0417234	0.37551	0.667574	0.306849	0.0814115	0.529174	0.407057	0.651292	0.0407057	0.0407057	0.325646	0.56988	0.814115	0.895526	0.773409
		0.844858	0.764395	0.628001	0.471001	0.549501	1.0205	0.588751	0.745751	1.03093	1.0339	1.0339	0.995612	1.18708	1.45512	1.18708	0.842441	0.957319	0.765855	0.842441	0.68927
		0.163026	0.244539	0.119287	0.357862	0.278337	0.556675	0.357862	0.357862	1.08616	0.931024	1.24137	0.465512	0.271549	0.465512	0.543097	0.58189	0.543097	0.387927	0.426719	0.426719
		0.841874	0.806796	0.924009	0.752896	0.752896	1.43735	0.41067	0.855564	0.28764	0.233715	0.400654	1.1018	1.16857	1.16857	1.03502	1.56923	0.93486	0.734533	1.16857	1.23535
		0.352365	0.493311	0.206262	0.171885	0.275016	0.309393	0.103131	0.206262	0.361174	0.436002	0.737849	0.637233	0.570156	0.0335386	0.637233	0.637233	0.771387	0.570156	0.603694	0.570156
		0.275981	0.338212	0.439676	0.372033	0.676424	0.57496	0.57496	0.27057	0.338212	0.202927	0.236748	0.563687	0.530529	0.464213	0.198948	0.530529	0.232106	0.33158	0.33158	0.397897
		0.308226	0.181309	0.0604364	0.181309	0.3324	0.241746	0.271964	0.362619	0.362619	0.302182	0.3324	0.503637	0.177754	0.20738	0.148128	0.296257	0.237006	0.681391	0.118503	0.355508
		0.324873	0	0.159252	0.398129	0.318503	0.238877	0.199064	0.0796258	0.398129	0.0398129	0.358316	1.01484	0.195161	0.312258	0.0780645	0.0390322	0.156129	1.01484	0.0780645	0.234193
		0.413972	0.541139	0.304391	0.57496	0.372033	0.541139	0.236748	0.710245	0.541139	0.372033	0.338212	0.895267	0.961583	0.696319	0.464213	0.265264	0.696319	1.0279	0.895267	0.563687
		0.178094	0.0349205	0.0698409	0.453966	0.279364	0.174602	0.488887	0.244443	0.314284	0.384125	0.209523	0.273886	0.376593	0.479301	0.205415	0.308122	0.308122	0.445065	0.410829	0.273886
		0.609729	0.421958	0.386794	0.421958	0.105489	0.210979	0.492284	0.527447	0.421958	0.351631	0.527447	0.758421	0.37921	0.344737	0.172368	0.655	0.482631	0.551579	0.448158	0.620526
		0.148561	0.145648	0.036412	0.400532	0.619003	0.728239	0.582591	0.582591	0.436944	0.400532	0.728239	0.785356	0.571168	0.642564	0.571168	0.963846	0.785356	0.999544	0.928148	0.999544
	alcohol consumption (g/kg/1h)	RI
	session	1	2	3	4	5	6	7	8	9	10	11	12	13	14	15	16	17	18	19	20
		0.825913	0.784617	0.725192	0.604327	0.644615	0.443173	1.16836	1.16836	0.888889	0.864727	0.707504	0.864727	1.10056	1.21848	1.80807	1.06126	1.10056	0.904033	0.707504	1.13987
		0.445993	0.686143	0.468586	0.301234	0.635938	0.468586	0.401645	0.568997	0.316484	0.914313	1.11024	0.587773	1.01228	0.489811	0.489811	0.653081	0.620427	0.881659	0.849005	0.685735
		0.390244	0.461197	0.588394	0.692229	0.692229	0.72684	0.48456	1.2114	0.618182	0.776647	0.97925	0.945483	1.51953	1.04678	1.24939	1.78966	1.28316	0.911716	1.21562	0.506509
		0.299468	0.187167	0.292164	0.255643	0.219123	0.365205	0.109561	0.328684	0.345324	0.285038	0.249408	0.427557	0.534446	0.0712594	0.320667	0.676965	0.249408	0.249408	0.391927	0.391927
		0.764278	0.260623	0.325779	0.521247	0.749292	0.456091	0.879604	0.586403	0.618981	0.521247	0.488669	0.76654	0.638783	0.862357	0.415209	0.351331	0.606844	0.542966	0.76654	0.38327
		0.738624	1.10345	0.862073	1.2069	1	1.13794	1.24138	0.82759	0.655175	0.862073	1.13794	0.912783	1.21704	1.04801	1.0142	0.94659	0.912783	1.28466	1.18324	1.5213
		0.524222	0.440523	0.367102	0.587363	0.550653	0.513943	0.256971	0.256971	0.293682	0.477233	0.697494	0.611837	0.755799	0.359904	0.575846	0.467875	0.611837	0.539856	0.467875	0.395894
		0.345844	0.493182	0.616478	0.40071	0.369887	0.431534	0.524006	0.339063	0.431534	0.369887	0.40071	0.483512	0.483512	0.60439	0.543951	0.815926	0.271975	0.543951	0.453292	0.513731
		0.662722	0.773485	0.52597	0.742546	0.897243	0.587849	0.959121	0.587849	0.649727	0.804424	0.990061	1.15264	0.727986	0.87965	0.788651	0.970648	1.06165	1.30431	1.15264	1.33464
		0.537656	0.74416	1.3953	0.899193	1.08523	0.899193	1.45731	0.589127	0.868187	0.961207	1.36429	1.61113	1.15515	1.36794	0.729569	1.36794	1.12475	1.36794	1.39834	1.27675
