# Supplementary material for: mTORC1 in the orbitofrontal cortex promotes habitual alcohol seeking
Source: eLife. 2019 Dec 11;8:e51333. doi: 10.7554/eLife.51333 (PMC6959998; doi:10.7554/eLife.51333)
Supplement: Figure 2—figure supplement 3—source data 1. [file elife-51333-fig2-figsupp3-data1.xlsx]

## Sheet: Figure 2 - figure supplement 3
		RI		RR
		Veh	Rapa	Veh	Rapa
	Alcohol (g/kg/30min)	0.201005	0.536013	0.374388	0.850883
		0.145852	0.145852	0.90219	0.624593
		0.900796	0.465929	0.832293	0.799001
		0.789618	1.22829	1.0917	1.67748
		0.63136	0.332295	1.72662	0.316547
		1.47725	1.26621	0.862441	0.137991
		0.817449	0.91177	1.51031	0.554806
		0.681462	0.286931	0.93401	0.690355
		0.980431	1.32833	0.965934	0.379474
		0.653862	1.11157	0.676759	0.106857
				1.11421	0.631383
				0.852071	1.45168
