# Supplementary material for: mTORC1 in the orbitofrontal cortex promotes habitual alcohol seeking
Source: eLife. 2019 Dec 11;8:e51333. doi: 10.7554/eLife.51333 (PMC6959998; doi:10.7554/eLife.51333)
Supplement: Figure 2—source data 1. [file elife-51333-fig2-data1.xlsx]

## Sheet: Figure 2 - source data 1
		c
		RR		RI
		ND	D	ND	D
	Lever responses	19	9	31	28
		27	16	9	10
		13	2	13	20
		29	7	14	9
		23	6	18	11
		19	10	22	14
		23	21	17	10
		22	16	1	3
		24	17	37	20
		6	9	22	23
		13	11
		32	14
