# Supplementary material for: mTORC1 in the orbitofrontal cortex promotes habitual alcohol seeking
Source: eLife. 2019 Dec 11;8:e51333. doi: 10.7554/eLife.51333 (PMC6959998; doi:10.7554/eLife.51333)
Supplement: Figure 2—source data 2. [file elife-51333-fig2-data2.xlsx]

## Sheet: Figure 2 - source data 2
		d
		Veh		Rapa
		ND	D	ND	D
	Lever responses	33	11	4	11
		16	19	24	7
		41	19	22	16
		27	12	21	8
		51	3	29	34
		4	14	4	8
		6	0	23	1
		2	6	13	0
		21	4	14	11
		18	7	12	7
		19	6	35	2
