# Supplementary material for: mTORC1 in the orbitofrontal cortex promotes habitual alcohol seeking
Source: eLife. 2019 Dec 11;8:e51333. doi: 10.7554/eLife.51333 (PMC6959998; doi:10.7554/eLife.51333)
Supplement: Figure 2—source data 3. [file elife-51333-fig2-data3.xlsx]

## Sheet: Figure 2 - source data 3
		e
		Veh		Rapa
		ND	D	ND	D
	Lever responses	25	21	42	11
		5	8	11	9
		15	1	24	2
		4	3	7	0
		41	13	30	4
		24	21	10	5
		4	2	4	0
		4	18	36	3
		10	13	16	16
