# Supplementary material for: mTORC1 in the orbitofrontal cortex promotes habitual alcohol seeking
Source: eLife. 2019 Dec 11;8:e51333. doi: 10.7554/eLife.51333 (PMC6959998; doi:10.7554/eLife.51333)
Supplement: Figure 3—source data 1. [file elife-51333-fig3-data1.xlsx]

## Sheet: Figure 3c
	lever responses		Veh		Rapa
			ND	D	ND	D
			8	8	7	8
			8	6	6	11
			12	6	13	5
			19	29	14	21
			6	13	11	10
			10	4	8	6
			6	8	1	2
