# Supplementary material for: mTORC1 in the orbitofrontal cortex promotes habitual alcohol seeking
Source: eLife. 2019 Dec 11;8:e51333. doi: 10.7554/eLife.51333 (PMC6959998; doi:10.7554/eLife.51333)
Supplement: Figure 5—figure supplement 2—source data 1. [file elife-51333-fig5-figsupp2-data1.xlsx]

## Sheet: Figure 5 - figure supplement 2
	Time	(0,1)	[1,2)	[2,3)	[3,4)	[4,5)	[5,6)	[6,7)	[7,8)	[8,9)	[9,10)	[10,11)	[11,12)	[12,13)	[13,14)	[14,15)	[15,16)	[16,17)	[17,18)	[18,19)	[19,20)	[20,∞)
	Veh	26.3158	5.26316	5.26316	31.5789	5.26316	5.26316	0	0	0	0	0	0	0	0	0	0	0	0	0	0	21.0526
		4	0	20	28	12	0	0	0	4	4	0	0	0	0	0	4	0	0	4	0	20
		0	2.94118	0	5.88235	17.6471	11.7647	2.94118	11.7647	11.7647	0	0	5.88235	0	2.94118	0	2.94118	0	0	0	5.88235	17.6471
		13.8889	13.8889	11.1111	11.1111	8.33333	8.33333	5.55556	2.77778	0	0	0	2.77778	2.77778	2.77778	2.77778	0	0	5.55556	0	0	8.33333
		36	18	22	6	4	2	4	0	0	0	0	2	0	2	0	0	0	0	0	0	4
		33.3333	24.2424	24.2424	9.09091	0	0	0	0	0	0	0	0	0	0	0	0	0	0	3.0303	0	6.06061
		18.1818	4.54545	0	27.2727	18.1818	13.6364	0	0	0	0	0	0	0	0	0	0	4.54545	0	0	0	13.6364
	Ro25	27.2727	0	0	18.1818	36.3636	0	0	0	0	0	0	0	0	0	0	0	0	0	0	9.09091	9.09091
		3.125	9.375	34.375	25	3.125	6.25	0	3.125	0	0	0	0	0	0	0	0	0	0	0	0	15.625
		0	0	0	0	0	0	0	0	0	0	0	0	0	0	0	0	0	0	0	0	0
		19.3548	19.3548	22.5806	19.3548	0	3.22581	0	0	0	0	3.22581	0	3.22581	0	0	0	0	0	0	0	9.67742
		0	7.69231	15.3846	38.4615	15.3846	7.69231	7.69231	0	0	0	0	0	0	0	0	0	0	0	0	0	7.69231
		25	12.5	37.5	6.25	0	6.25	0	0	0	0	0	0	6.25	0	0	0	0	0	0	0	6.25
		12.5	12.5	0	25	12.5	12.5	0	0	0	0	0	0	0	0	0	0	0	0	0	0	25
