# Supplementary material for: mTORC1 in the orbitofrontal cortex promotes habitual alcohol seeking
Source: eLife. 2019 Dec 11;8:e51333. doi: 10.7554/eLife.51333 (PMC6959998; doi:10.7554/eLife.51333)
Supplement: Figure 5—figure supplement 3—source data 1. [file elife-51333-fig5-figsupp3-data1.xlsx]

## Sheet: Figure 5 - figure supplement 3
		Vehicle	Ro25
	Alcohol Consumption (g/kg/30min)	0.361739	0.612174
		0.591376	0.755647
		0.573705	0.573705
		0.297297	0.810811
		0.354125	0.901408
		0.11985	0.569288
		0.332075	1.90189
		1.40586	0.803347
		0.668132	0.914286
		1.14798	1.61435
		0.74	1
		0.7	0.96
