# Supplementary material for: mTORC1 in the orbitofrontal cortex promotes habitual alcohol seeking
Source: eLife. 2019 Dec 11;8:e51333. doi: 10.7554/eLife.51333 (PMC6959998; doi:10.7554/eLife.51333)
Supplement: Figure 5—source data 1. [file elife-51333-fig5-data1.xlsx]

## Sheet: Figure 5 - source data 1
	a
	Time	0-3	3-6	6-9	9-12	12-15	15-18	18-21	21-24	24-27	27-30
	Veh	12	14	14	14	14	19	19	19	19	19
		8	8	22	22	22	25	25	25	25	25
		11	21	31	31	34	34	34	34	34	34
		7	25	27	36	36	36	36	36	36	36
		18	21	21	21	21	21	21	21	50	50
		33	33	33	33	34	34	34	34	34	34
		6	16	22	22	22	22	22	22	22	22
	Ro25	11	11	11	11	11	11	11	11	11	11
		8	26	26	26	26	27	27	32	32	32
		0	0	0	0	0	0	0	0	0	0
		3	3	3	3	3	21	31	31	31	31
		0	0	0	13	13	13	13	13	13	13
		16	16	16	16	16	16	16	16	16	16
		8	8	8	8	8	8	8	8	8	8
