# Supplementary material for: mTORC1 in the orbitofrontal cortex promotes habitual alcohol seeking
Source: eLife. 2019 Dec 11;8:e51333. doi: 10.7554/eLife.51333 (PMC6959998; doi:10.7554/eLife.51333)
Supplement: Figure 5—source data 2. [file elife-51333-fig5-data2.xlsx]

## Sheet: Figure 5 - source data 2
	b				c
		VEH	Ro25			VEH	Ro25
	Active press	19	11		Active press rate	3.16667	1.83333
		25	32			4.16667	5.33333
		34	0			5.66667	0
		36	31			6	5.16667
		50	13			8.33333	2.16667
		34	16			5.66667	2.66667
		22	8			3.66667	1.33333
