# Supplementary material for: mTORC1 in the orbitofrontal cortex promotes habitual alcohol seeking
Source: eLife. 2019 Dec 11;8:e51333. doi: 10.7554/eLife.51333 (PMC6959998; doi:10.7554/eLife.51333)
Supplement: Figure 5—source data 3. [file elife-51333-fig5-data3.xlsx]

## Sheet: Figure 5 - source data 3
		e
		Veh		Ro25
		ND	D	ND	D
	Lever responses	13	4	8	2
		12	11	14	10
		0	0	4	5
		3	11	16	4
		6	4	7	2
		9	0	4	0
