# Supplementary material for: mTORC1 in the orbitofrontal cortex promotes habitual alcohol seeking
Source: eLife journal article supplement (doi:10.7554/elife.51333), 2019-12-10
Supplement: supp [file elife_poa_e51333_Figure_5_source_data_3.xlsx]

## Sheet: Figure 5 - source data 3
		e
		Devaluation
		Vehicle												Ro25
	ND	45.83	58	55.26	45.45	60.71	52.94	46.67	45.45	41.67	76.47	52.17	60.11	72.41	63.41	61.54	53.33	73.47	63.64	45.45	57.14	86.67	80	58.33	77.78
	D	54.17	42	44.74	54.55	39.29	47.06	53.33	54.55	58.33	23.53	47.83	40	27.59	36.59	38.46	46.67	26.53	36.36	54.55	42.86	13.33	20	41.67	22.22
